# Supplementary material
Source: MDPI journal article supplement (https://www.mdpi.com/2073-4344/12/12/1564)
Supplement: s1 [file s1]

## Supplementary Materials

### Catalytic Wet Peroxide Oxidation of Anionic Pollutants over Fluorinated Fe<sub>3</sub>O<sub>4</sub> Microspheres at Circumneutral pH Values

Fengxi Chen <sup>1\*</sup>, Huaixiang Lv <sup>1</sup>, Wu Chen <sup>2</sup>, Rong Chen <sup>1,3</sup>

<sup>1</sup> State Key Laboratory of New Textile Materials & Advanced Processing Technologies, Wuhan Textile University, Wuhan 430200, PR China

<sup>2</sup> School of Chemistry and Environmental Engineering, Wuhan Institute of Technology, Wuhan 430205, P. R. China

<sup>3</sup> Henan Institute of Advanced Technology, Zhengzhou University, Zhengzhou 450002, P.R. China

\* Correspondence: fxchen@wtu.edu.cn (F.C.)

**Table S1.** Effect of initial H<sub>2</sub>O<sub>2</sub> concentration on OG decolorization with H<sub>2</sub>O<sub>2</sub> over F-Fe<sub>3</sub>O<sub>4</sub>-1 microspheres

| [H <sub>2</sub> O <sub>2</sub> ] <sub>0</sub><br>(mM) | 15-min<br>adsorption (%) | 2-h<br>DR (%) | k <sub>s1</sub> /min <sup>-1</sup><br>(R <sup>2</sup> ) |
|-------------------------------------------------------|--------------------------|---------------|---------------------------------------------------------|
| 20                                                    | 13.2                     | 65.9          | 0.0082 (0.993)                                          |
| 40                                                    | 12.3                     | 96.8          | 0.0284 (0.991)                                          |
| 60                                                    | 13.3                     | 97.3          | 0.0304 (0.992)                                          |
| 80                                                    | 10.3                     | 90.3          | 0.0182 (0.994)                                          |

Reaction conditions: OG (0.1 mM, pH 6.5) and F-Fe<sub>3</sub>O<sub>4</sub>-1 (0.5 g/L) at 40 °C for 2 h.

**Table S2.** Effect of initial pH on OG decolorization with H<sub>2</sub>O<sub>2</sub> over F-Fe<sub>3</sub>O<sub>4</sub>-1 microspheres

| [pH] <sub>0</sub> | 15-min<br>adsorption (%) | 2-h<br>DR (%) | k <sub>s1</sub> /min <sup>-1</sup><br>(R <sup>2</sup> ) |
|-------------------|--------------------------|---------------|---------------------------------------------------------|
| 3.0               | 22.2                     | 97.5          | 0.0381 (0.991)                                          |
| 5.0               | 15.2                     | 97.4          | 0.0320 (0.990)                                          |
| 6.5               | 12.3                     | 96.8          | 0.0284 (0.991)                                          |
| 7.0               | 10.8                     | 94.8          | 0.0252 (0.995)                                          |
| 9.0               | 8.1                      | 88.5          | 0.0175 (0.992)                                          |

Reaction conditions: OG (0.1 mM) and F-Fe<sub>3</sub>O<sub>4</sub>-1 (0.5 g/L) at 40 °C for 2 h.

**Table S3.** Effect of reaction temperature on OG decolorization with H<sub>2</sub>O<sub>2</sub> over F-Fe<sub>3</sub>O<sub>4</sub>-1 microspheres

| Temperature<br>(°C) | 15-min<br>adsorption (%) | 2-h<br>DR (%) | k <sub>s1</sub> /min <sup>-1</sup><br>(R <sup>2</sup> ) |
|---------------------|--------------------------|---------------|---------------------------------------------------------|
| 25                  | 5.5                      | 32.6          | 0.0028 (0.991)                                          |
| 40                  | 12.3                     | 96.8          | 0.0284 (0.990)                                          |
| 55                  | 13.1                     | 99.5          | 0.0445 (0.991)                                          |

Reaction conditions: OG (0.1 mM, pH 6.5) and F-Fe<sub>3</sub>O<sub>4</sub>-1 (0.5 g/L) for 2 h.

**Table S4.** EDX-determined elemental composition of F-Fe<sub>3</sub>O<sub>4</sub>-1 microspheres

| Element/wt% | O        | F       | Fe       |
|-------------|----------|---------|----------|
| Spot 1      | 15.19    | 8.24    | 76.57    |
| Spot 2      | 16.41    | 7.57    | 76.02    |
| Spot 3      | 16.71    | 5.48    | 77.82    |
| Average/wt% | 16.1±0.8 | 7.1±1.4 | 76.8±0.9 |

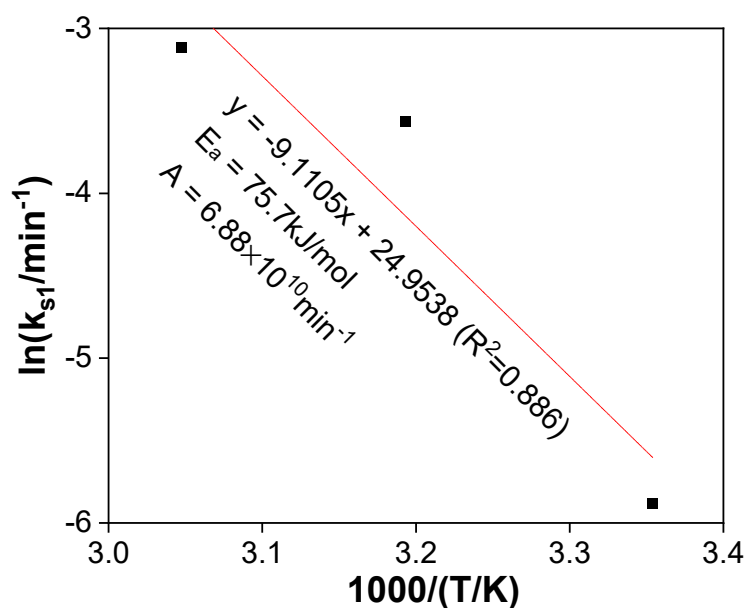

**Figure S1.** The Arrhenius plot of the decolorization of OG (0.1 mM, pH 6.5) with H<sub>2</sub>O<sub>2</sub> on F-Fe<sub>3</sub>O<sub>4</sub>-1 microspheres.
